# Supplementary material for: Unravelling the bull fertility proteome
Source: Royal Society of Chemistry journal article supplement (doi:10.1039/c3mb25494a), 2013-01-21
Supplement: c3mb25494a.pdf [file c3mb25494a.pdf]

File Name : Figure s1.tif

Caption : nLC-MSE data quality evaluation. Analytical reproducibility was assessed by monitoring the mass precision (upper panels) and the variability of retention times (bottom panels) for the EMRTs. Bar charts show that Mass Relative Standard Deviations (RSD Mass) are below 15ppm in ERCR+ (A) and ERCR- (B) groups; The distributions of Retention Time Coefficient of Variation (%CVRT) are centred around mean values of 1.5 and 2 in ERCR+ (C) and ERCR- (D) groups, respectively.
