# Supplementary material for: Unravelling the bull fertility proteome
Source: Royal Society of Chemistry journal article supplement (doi:10.1039/c3mb25494a), 2013-01-21
Supplement: c3mb25494a_2.pdf [file c3mb25494a_2.pdf]

**Supplementary Table 1. nLC-MS<sup>E</sup> identification of differential expressed proteins in ERCR+ and ERCR- groups.**

| Accession | Description                              | Score                 | Seq. cov [%] | Peptide mass | Peptide Score | Sequence                                 | RT     | z |
|-----------|------------------------------------------|-----------------------|--------------|--------------|---------------|------------------------------------------|--------|---|
| P61603    | 10 kDa heat shock protein mitochondrial  | 712.04                | 45.1         | 1076.59      | 6.16          | VLLPEYGGTK                               | 69.19  | 2 |
|           |                                          |                       |              | 1529.79      | 6.17          | VVLDDKDYFLFR                             | 96.68  | 3 |
|           |                                          |                       |              | 1013.56      | 6.12          | GGEIQPVSVK                               | 52.11  | 2 |
|           |                                          |                       |              | 1315.75      | 5.61          | VLQATVVAVGSGSK                           | 64.11  | 2 |
|           |                                          |                       |              | 1331.66      | 5.95          | LDDKDYFLFR                               | 96.68  | 2 |
|           |                                          |                       |              | 751.36       | 5.86          | PEYGGTK                                  | 69.19  | 1 |
| P19483    | ATP synthase subunit alpha mitochondrial | 311.80                | 34.9         | 1667.79      | 4.93          | NVQAEEMVEFSSGLK                          | 67.30  | 3 |
|           |                                          |                       |              | 1624.89      | 6.18          | TGAIVDVPVGEELLGR                         | 99.95  | 2 |
|           |                                          |                       |              | 1391.70      | 5.42          | TGTAEVSSILEER                            | 77.96  | 2 |
|           |                                          |                       |              | 1000.57      | 5.81          | VLSIGDGIAR                               | 71.63  | 2 |
|           |                                          |                       |              | 2338.16      | 5.05          | EVAFAQFGSDLDAATQQLLSR                    | 131.66 | 3 |
|           |                                          |                       |              | 1287.69      | 5.29          | HALIYDDLK                                | 76.44  | 2 |
|           |                                          |                       |              | 1026.59      | 5.83          | AVDSLVPPIGR                              | 75.24  | 2 |
|           |                                          |                       |              | 892.48       | 5.60          | LELAQYR                                  | 61.94  | 2 |
|           |                                          |                       |              | 1171.63      | 4.27          | VVDALGNAIDGK                             | 72.72  | 2 |
|           |                                          |                       |              | 845.51       | 5.10          | STVAQLVK                                 | 61.07  | 2 |
|           |                                          |                       |              | 2309.15      | 4.92          | QGQYSPMAIEEQVAVIYAGVR                    | 131.97 | 3 |
|           |                                          |                       |              | 2104.03      | 4.40          | GMSLNLEPDNVGVVVFNDK                      | 76.70  | 3 |
|           |                                          |                       |              | 789.42       | 4.46          | VGSAAQTR                                 | 45.31  | 2 |
|           |                                          |                       |              | 1081.49      | 4.99          | RFNDGTDEK                                | 38.55  | 2 |
|           |                                          |                       |              | 1710.93      | 5.04          | VVDALGNAIDGKPIGSK                        | 74.43  | 3 |
|           |                                          |                       |              | 1730.96      | 4.73          | QTGKTSIAIDTIINQK                         | 134.02 | 2 |
|           |                                          |                       |              | 1728.86      | 4.53          | GMSLNLEPDNVGVVVFNDK                      | 76.69  | 2 |
|           |                                          |                       |              | 1033.56      | 3.87          | VGVVVFNDK                                | 76.71  | 2 |
|           |                                          |                       |              | 788.42       | 5.44          | SIGDGIAR                                 | 71.64  | 1 |
|           |                                          |                       |              | 740.39       | 4.29          | VVDALGNA                                 | 72.67  | 1 |
| 1126.54   | 4.58                                     | EMVEFSSGLK            | 67.28        | 2            |               |                                          |        |   |
| 982.56    | 4.47                                     | VLSIGDGIAR            | 71.65        | 2            |               |                                          |        |   |
| 2320.15   | 5.00                                     | EVAFAQFGSDLDAATQQLLSR | 131.69       | 3            |               |                                          |        |   |
| P05630    | ATP synthase subunit delta mitochondrial | 830.29                | 58.33        | 4122.23      | 6.22          | QVDVPTQTGAFGILAAHVPTLQVLRPGLVVVHAEDGTTSK | 118.06 | 5 |
|           |                                          |                       |              | 986.55       | 5.68          | IEANEALVK                                | 55.32  | 2 |
|           |                                          |                       |              | 1431.70      | 6.32          | AQSELLGADEATR                            | 68.16  | 2 |
|           |                                          |                       |              | 3600.79      | 5.62          | YFVSSGSVTVNADSSVQLLAEAVTLDMLDLGAAK       | 133.78 | 4 |
|           |                                          |                       |              | 744.42       | 5.13          | ANEALVK                                  | 55.35  | 1 |
| 969.52    | 4.83                                     | IEANEALVK             | 55.29        | 2            |               |                                          |        |   |
| P62157    | Calmodulin                               | 2244.05               | 71.14        | 1754.87      | 7.27          | VFDKDGNGYISAAELR                         | 74.51  | 3 |
|           |                                          |                       |              | 1844.89      | 7.30          | EAFSLFDKDGDTITTK                         | 84.27  | 3 |
|           |                                          |                       |              | 1596.71      | 6.39          | DTDSEEEIREAFR                            | 73.91  | 3 |
|           |                                          |                       |              | 1855.84      | 6.46          | MKDTDSEEEIREAFR                          | 68.90  | 3 |
|           |                                          |                       |              | 1693.84      | 5.50          | DGDGTITTKELGTVMR                         | 126.03 | 2 |

|        |                                    |        |       |         |      |                                       |        |   |
|--------|------------------------------------|--------|-------|---------|------|---------------------------------------|--------|---|
|        |                                    |        |       | 4069.84 | 5.36 | SLGQNPTEAELQDMINEVDADGNGTIDFPEFLTMMAR | 101.04 | 5 |
|        |                                    |        |       | 2631.29 | 5.43 | EAFSLFDKDGDTITTKELGTVMR               | 115.55 | 3 |
|        |                                    |        |       | 4265.06 | 5.12 | MADQLTEEQIAEFKEAFSLFDKDGDTITTKELGTVMR | 93.57  | 4 |
|        |                                    |        |       | 4101.83 | 5.72 | SLGQNPTEAELQDMINEVDADGNGTIDFPEFLTMMAR | 109.33 | 5 |
|        |                                    |        |       | 996.44  | 5.65 | VFDKDGNGY                             | 74.50  | 2 |
|        |                                    |        |       | 1380.63 | 5.92 | DSEEEIREAFR                           | 73.91  | 2 |
|        |                                    |        |       | 759.43  | 7.13 | ISAAELR                               | 74.49  | 1 |
|        |                                    |        |       | 1049.53 | 5.11 | EEIREAFR                              | 68.89  | 2 |
|        |                                    |        |       | 1644.81 | 7.02 | FSLFDKDGDTITTK                        | 84.31  | 2 |
|        |                                    |        |       | 1150.55 | 7.14 | DKDGDGTITTK                           | 84.28  | 2 |
|        |                                    |        |       | 833.37  | 5.78 | VFDKDGNG                              | 74.49  | 1 |
|        |                                    |        |       | 1467.67 | 5.87 | VFDKDGNGYISAAE                        | 74.47  | 2 |
|        |                                    |        |       | 1578.70 | 5.53 | DTDSEEEIREAFR                         | 73.93  | 3 |
|        |                                    |        |       | 1837.83 | 5.04 | MKDTDSEEEIREAFR                       | 68.89  | 4 |
| Q32LG3 | Malate dehydrogenase mitochondrial | 610.62 | 35.8  | 2393.24 | 6.36 | LTYDIAHTPGVAADLSHIETR                 | 102.46 | 4 |
|        |                                    |        |       | 1233.72 | 6.03 | IFGVTTLDIVR                           | 103.00 | 2 |
|        |                                    |        |       | 1793.08 | 6.08 | VAVLGASGGIGQPLSLLLK                   | 120.19 | 2 |
|        |                                    |        |       | 1370.77 | 6.19 | TIPLISQCTPK                           | 87.91  | 2 |
|        |                                    |        |       | 1489.73 | 5.06 | GYLGPQLPDCLK                          | 85.86  | 2 |
|        |                                    |        |       | 1338.71 | 5.98 | GCDVVVIPAGVPR                         | 80.97  | 2 |
|        |                                    |        |       | 962.53  | 5.40 | ANAFVAELK                             | 71.93  | 2 |
|        |                                    |        |       | 1153.55 | 5.32 | EGVVECSFVK                            | 66.20  | 2 |
|        |                                    |        |       | 2462.20 | 5.15 | FVFSLVDAMNGKEGVVECSFVK                | 62.20  | 4 |
|        |                                    |        |       | 2179.11 | 6.24 | LYDIAHTPGVAADLSHIETR                  | 102.45 | 3 |
|        |                                    |        |       | 1156.56 | 4.95 | GPEQLPDCLK                            | 85.85  | 2 |
|        |                                    |        |       | 783.53  | 5.37 | PLSLLLK                               | 120.17 | 2 |
|        |                                    |        |       | 632.30  | 4.38 | PDCLK                                 | 85.85  | 1 |
|        |                                    |        |       | 1043.55 | 5.11 | PLISQCTPK                             | 87.91  | 2 |
| Q9BG11 | Peroxiredoxin 5 mitochondrial      | 693.72 | 58.9  | 3204.65 | 6.27 | LLADPSGTFGKETDLLLDDSLFLFGNHR          | 149.48 | 4 |
|        |                                    |        |       | 2118.08 | 5.70 | ETDLLLDDSLFLFGNHR                     | 137.39 | 3 |
|        |                                    |        |       | 1607.82 | 5.93 | GVLFGLPGAFTPGCSK                      | 108.33 | 2 |
|        |                                    |        |       | 1525.80 | 6.20 | THLPGFVEQADALK                        | 80.13  | 3 |
|        |                                    |        |       | 1405.72 | 5.20 | ATIVEGASTTAAGTR                       | 97.23  | 2 |
|        |                                    |        |       | 2406.21 | 5.12 | GIQVVACLTVNDVFVTEEWAR                 | 125.29 | 3 |
|        |                                    |        |       | 3633.83 | 4.77 | FSMVIEDGIVKSLNVEPDGTGLTCSLAPNLSQL     | 106.88 | 5 |
|        |                                    |        |       | 752.40  | 5.59 | THLPGFV                               | 80.11  | 1 |
|        |                                    |        |       | 881.45  | 5.49 | THLPGFVE                              | 80.14  | 2 |
|        |                                    |        |       | 774.39  | 4.89 | EQADALK                               | 80.11  | 1 |
|        |                                    |        |       | 645.35  | 5.05 | QADALK                                | 80.11  | 1 |
|        |                                    |        |       | 873.46  | 4.90 | VEQADALK                              | 80.12  | 2 |
|        |                                    |        |       | 1009.51 | 5.57 | THLPGFVEQ                             | 80.12  | 2 |
|        |                                    |        |       | 2100.07 | 5.24 | ETDLLLDDSLFLFGNHR                     | 137.39 | 3 |
| Q32KL7 | Sperm equatorial segment protein 1 | 781.53 | 22.68 | 2981.36 | 6.84 | EPFIEKDEPEPEPEPEPEPEVHR               | 68.77  | 4 |
|        |                                    |        |       | 984.55  | 5.70 | QLLNNNIR                              | 55.93  | 2 |

|        |                                |         |       |         |      |                             |        |   |
|--------|--------------------------------|---------|-------|---------|------|-----------------------------|--------|---|
|        |                                |         |       | 1186.59 | 5.74 | SPNNANFIGPR                 | 57.15  | 2 |
|        |                                |         |       | 2974.40 | 5.90 | YTHDVGPGDNDVLINPVSEETTTFPTR | 90.03  | 3 |
|        |                                |         |       | 2237.98 | 5.89 | DEPEPEPEPEPEPEVHR           | 56.91  | 3 |
|        |                                |         |       | 1204.66 | 5.30 | ILHILDTHDK                  | 137.37 | 2 |
|        |                                |         |       | 1401.72 | 5.48 | SKSPNNANFIGPR               | 50.49  | 2 |
|        |                                |         |       | 810.44  | 5.26 | QLLNNNI                     | 55.95  | 2 |
|        |                                |         |       | 1993.91 | 5.88 | PEPEPEPEPEPEVHR             | 56.92  | 3 |
|        |                                |         |       | 863.43  | 5.65 | PEPVEHR                     | 68.76  | 2 |
| P02784 | Seminal plasma protein PDC 109 | 9678.98 | 43.28 | 1187.59 | 8.46 | CVFPIYGGK                   | 101.15 | 2 |
|        |                                |         |       | 2739.20 | 8.60 | HFDCTVHGSLFPWCSLDADYVGR     | 104.69 | 3 |
|        |                                |         |       | 2333.01 | 7.08 | IGSMWMSWCSLSPNYDKDR         | 103.93 | 3 |
|        |                                |         |       | 1315.68 | 6.82 | CVFPIYGGKK                  | 89.13  | 3 |
|        |                                |         |       | 2061.88 | 6.12 | IGSMWMSWCSLSPNYDK           | 31.25  | 2 |
|        |                                |         |       | 2867.30 | 7.76 | KHFDCTVHGSLFPWCSLDADYVGR    | 98.23  | 4 |
|        |                                |         |       | 1664.81 | 5.98 | DYAKCVFPIYGGK               | 107.70 | 2 |
|        |                                |         |       | 2365.01 | 8.00 | IGSMWMSWCSLSPNYDKDR         | 87.56  | 3 |
|        |                                |         |       | 2349.01 | 7.72 | IGSMWMSWCSLSPNYDKDR         | 97.09  | 3 |
|        |                                |         |       | 1301.57 | 7.81 | HFDCTVHGSLF                 | 104.68 | 2 |
|        |                                |         |       | 1584.70 | 8.11 | HFDCTVHGSLFPW               | 104.69 | 2 |
|        |                                |         |       | 2130.91 | 7.94 | HFDCTVHGSLFPWCSLDA          | 104.69 | 3 |
|        |                                |         |       | 2059.87 | 7.79 | HFDCTVHGSLFPWCSLD           | 104.69 | 3 |
|        |                                |         |       | 2508.07 | 7.93 | HFDCTVHGSLFPWCSLDADYV       | 104.70 | 3 |
|        |                                |         |       | 995.47  | 7.72 | SLDADYVGR                   | 104.68 | 2 |
|        |                                |         |       | 1831.76 | 7.66 | HFDCTVHGSLFPWCS             | 104.70 | 3 |
|        |                                |         |       | 2259.01 | 7.33 | KHFDCTVHGSLFPWCSLDA         | 98.28  | 3 |
|        |                                |         |       | 795.36  | 7.13 | DADYVGR                     | 98.27  | 1 |
|        |                                |         |       | 609.29  | 7.26 | DYVGR                       | 104.69 | 1 |
|        |                                |         |       | 2374.03 | 7.44 | KHFDCTVHGSLFPWCSLDAD        | 98.27  | 3 |
|        |                                |         |       | 1959.86 | 7.21 | KHFDCTVHGSLFPWCS            | 98.25  | 3 |
|        |                                |         |       | 2636.16 | 7.13 | KHFDCTVHGSLFPWCSLDADYV      | 98.26  | 3 |
|        |                                |         |       | 1282.59 | 6.97 | KHFDCTVHGSL                 | 98.22  | 2 |
|        |                                |         |       | 1915.78 | 6.13 | IGSMWMSWCSLSPNYD            | 31.24  | 3 |
|        |                                |         |       | 680.33  | 7.48 | ADYVGR                      | 98.29  | 1 |
|        |                                |         |       | 1155.51 | 7.46 | CSLDADYVGR                  | 98.27  | 2 |
|        |                                |         |       | 552.31  | 6.47 | YGGKK                       | 89.10  | 1 |
|        |                                |         |       | 651.29  | 6.65 | CVFPF                       | 89.09  | 1 |
|        |                                |         |       | 1056.58 | 6.08 | FPFIYGGKK                   | 89.13  | 2 |
|        |                                |         |       | 909.51  | 6.29 | PFIYGGKK                    | 89.13  | 2 |
|        |                                |         |       | 908.44  | 7.39 | LDADYVGR                    | 98.25  | 2 |
|        |                                |         |       | 1398.60 | 8.01 | HFDCTVHGSLFP                | 104.71 | 3 |
|        |                                |         |       | 2693.19 | 7.16 | KHFDCTVHGSLFPWCSLDADYVGR    | 98.23  | 3 |
